# Supplementary material
Source: Springer Nature journal article supplement (https://www.springermedizin.de/resource/supplementary/12957_2013_1583_MOESM1_ESM.pdf/9563946)

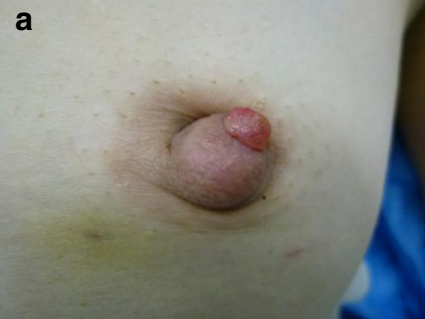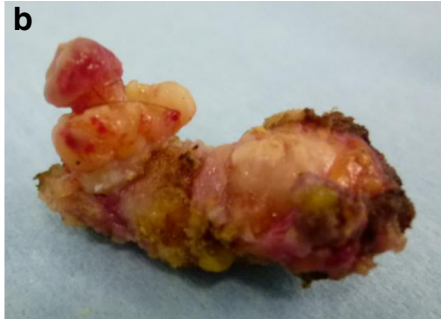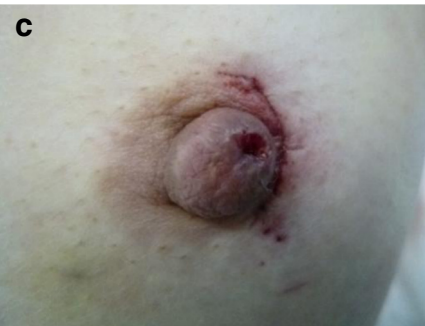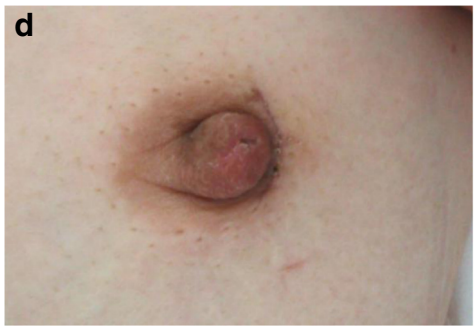

Supplement: MOESM1 [file 9563946]
